# Risk factors for anastomotic failure after total mesorectal excision of rectal cancer

K. C. M. J. Peeters<sup>1</sup>, R. A. E. M. Tollenaar<sup>1</sup>, C. A. M. Marijnen<sup>2</sup>, E. Klein Kranenbarg<sup>1</sup>, W. H. Steup<sup>3</sup>, T. Wiggers<sup>4</sup>, H. J. Rutten<sup>5</sup> and C. J. H. van de Velde<sup>1</sup> for the Dutch Colorectal Cancer Group

Departments of <sup>1</sup>Surgery and <sup>2</sup>Clinical Oncology, Leiden University Medical Centre, Leiden, <sup>3</sup>Department of Surgery, Leyenburg Hospital, The Hague, <sup>4</sup>Department of Surgical Oncology, Groningen University Hospital, Groningen and <sup>5</sup>Department of Surgery, Catharina Hospital, Eindhoven, The Netherlands

Correspondence to: Mr C. J. H. van de Velde, Department of Surgery K6-R, Leiden University Medical Centre, PO Box 9600, 2300 RC Leiden, The Netherlands (e-mail: C.J.H.van\_de\_Velde@lumc.nl)

**Background:** Anastomotic leakage is a major complication of rectal cancer surgery. The aim of this study was to investigate risk factors associated with symptomatic anastomotic leakage after total mesorectal excision (TME).

**Methods:** Between 1996 and 1999, patients with operable rectal cancer were randomized to receive short-term radiotherapy followed by TME or to undergo TME alone. Eligible Dutch patients who underwent an anterior resection (924 patients) were studied retrospectively.

**Results:** Symptomatic anastomotic leakage occurred in 107 patients (11.6 per cent). Pelvic drainage and the use of a defunctioning stoma were significantly associated with a lower anastomotic failure rate. A significant correlation between the absence of a stoma and anastomotic dehiscence was observed in both men and women, for both distal and proximal rectal tumours. In patients with anastomotic failure, the presence of pelvic drains and a covering stoma were both related to a lower requirement for surgical reintervention.

**Conclusion:** Placement of one or more pelvic drains after TME may limit the consequences of anastomotic failure. The clinical decision to construct a defunctioning stoma is supported by this study.

Paper accepted 14 July 2004

Published online 6 December 2004 in Wiley InterScience (www.bjs.co.uk). DOI: 10.1002/bjs.4806

## Introduction

Symptomatic anastomotic leakage is the most important surgical complication of rectal cancer surgery. Leakage after low anterior resection can result in significant morbidity and mortality<sup>1–5</sup>, and may be associated with a higher local recurrence rate<sup>6–8</sup>. Since the introduction of total mesorectal excision (TME) by Heald<sup>9</sup>, TME has become the accepted standard for rectal cancer surgery. The low recurrence and improved survival rates in TME series support the value of removing the fatty tissue around the rectum, known as the mesorectum<sup>10–12</sup>.

However, concern has been expressed about the increased risk of symptomatic anastomotic leakage associated with TME<sup>13,14</sup>. The increase in sphincter-saving procedures and the subsequently higher proportion of patients with distal bowel anastomoses may contribute to an increased incidence of anastomotic failure. In addition, TME potentially endangers the blood supply to the remaining rectum, and may compromise anastomotic healing. Finally, removal of the mesorectum leaves a large pelvic space in which a haematoma may accumulate and lead to pelvic sepsis. To avoid the severe complications of anastomotic failure it is crucial to take all possible measures to prevent symptomatic anastomotic leakage. The aim of this study was to identify risk factors for symptomatic anastomotic leakage in patients undergoing TME for rectal cancer.

The Editors have satisfied themselves that all authors have contributed significantly to this publication

## Patients and methods

### Study population

The database of the Dutch TME trial was used. This was a large international multicentre trial that investigated the efficacy of short-term preoperative radiotherapy ( $5 \times 5$  Gy) in patients with rectal cancer treated by TME. From January 1996 to December 1999, 1861 patients with histologically proven adenocarcinoma of the rectum but with no evidence of distant metastases were included in the trial and randomized to receive preoperative irradiation followed by TME surgery or TME alone. Patients were eligible for randomization when the tumour was located below the level of S1–2 and was 15 cm or less from the anal verge, measured during withdrawal of a flexible colonoscope. In addition, the tumour had to be clinically resectable (R0 resection). Results of the Dutch TME trial have been published previously<sup>15</sup>.

In the present retrospective analysis, only data that had been collected prospectively during the TME trial were used. Only Dutch patients (1530 patients) were considered as their details and treatment characteristics, as well as surgical complications and deaths, were known to be complete and had been checked extensively during trial accrual by the study coordinators<sup>16</sup>.

### Surgery

Within the context of the TME trial, an extensive structure of workshops, symposia and instruction videos was developed to ensure optimal surgical quality and standardization of the TME technique<sup>17</sup>. In the protocol, the construction of a defunctioning stoma was recommended according to the surgeon's discretion, as was the decision to drain the remaining pelvic cavity. In addition, a side-to-end or colonic pouch anastomosis was advised, in an attempt to minimize the risk of anastomotic dehiscence. All surgical characteristics as well as operative and postoperative complications were recorded on a data form by the operating surgeon. These forms were compared with the operating report and discharge letters by the surgical trial coordinator, and checked for inconsistencies. When the data were unclear or incomplete, additional information was requested.

Symptomatic anastomotic leakage, the endpoint of this analysis, was defined as clinically apparent leakage (gas, pus or faecal discharge from the pelvic drain, or peritonitis) or extravasation of endoluminally administered water-soluble contrast on radiography or computed tomography. An abscess around the anastomosis was also recorded as a leakage. Radiological examination was performed only when there was clinical suspicion of anastomotic leakage.

### Data collection and statistics

All forms were sent to the central data centre in Leiden. After checking, data were entered into a database and analysed with SPSS<sup>®</sup> statistical software (version 11.5 for Windows) (SPSS, Chicago, Illinois, USA). The  $\chi^2$  test was used to compare proportions; a two-sided  $P$  value of 0.050 was considered significant. The influence of independent variables on the risk of clinical anastomotic leakage was calculated using single-variable regression analysis. All variables associated with leakage with  $P < 0.100$  were entered in a multiple regression analysis.  $P \leq 0.050$  was considered statistically significant.

### Results

Of the 1530 randomized Dutch patients, 1480 were eligible for enrolment into the clinical trial. Reasons for ineligibility were no adenocarcinoma (seven patients), other or previous malignancy (26), previous treatment (three), transanal resection (one), double tumour (six), sigmoid carcinoma (five) and tumour considered irresectable at randomization (two). Of all eligible patients, 441 underwent an abdominoperineal resection, 78 had a Hartmann procedure and in 37 patients no tumour resection was performed. The remaining 924 patients, who were evaluated in the present analysis, underwent an anterior resection according to the TME principle.

Five hundred and seventy patients (61.7 per cent) were men and 354 (38.3 per cent) were women; their median age was 64.0 (range 23–92) years. The average distance of the tumour from the anal verge was 8.4 (range 0–18) cm. Some 459 patients (49.7 per cent) were assigned to preoperative radiotherapy, the remaining patients to surgery alone. Clinical symptomatic anastomotic leakage was detected in 107 patients (11.6 per cent).

Patients who received preoperative irradiation did not have an increased risk of anastomotic leakage compared with non-irradiated patients (10.9 *versus* 12.3 per cent;  $P = 0.517$ ). However, a defunctioning stoma was constructed more often in irradiated patients (59.9 *versus* 53.3 per cent;  $P = 0.044$ ).

A defunctioning ileostomy or colostomy was constructed in 523 (56.6 per cent) of patients. Forty-three patients (8.2 per cent) with a stoma had a leakage, compared with 64 (16.0 per cent) of the 401 patients without a stoma ( $P < 0.001$ ). The presence of one or more pelvic drains after surgery was strongly associated with a lower leakage rate: 76 (9.6 per cent) of 792 patients with pelvic drainage had leakage, compared with 31 (23.5 per cent) of 132 patients without a drain ( $P < 0.001$ ). Men had more leakage than women (13.2 *versus* 9.0 per cent),

**Table 1** Single-variable regression analysis of symptomatic anastomotic leakage

|                                            | No. with leakage<br>(n = 924)* | Relative risk†     | P**     |
|--------------------------------------------|--------------------------------|--------------------|---------|
| Sex                                        |                                |                    |         |
| F                                          | 32 of 354 (9.0)                | 1.00               |         |
| M                                          | 75 of 570 (13.2)               | 1.53 (0.99, 2.36)  | 0.057   |
| Age                                        |                                | 0.99 (0.97, 1.01)  | 0.417   |
| Distance of tumour<br>from anal verge (cm) |                                |                    |         |
| ≥ 10.1                                     | 46 of 395 (11.6)               | 1.00               |         |
| 5.1–10.0                                   | 52 of 462 (11.3)               | 0.96 (0.63, 1.47)  | 0.858   |
| ≤ 5.0                                      | 9 of 67 (13)                   | 1.18 (0.55, 2.53)  | 0.676   |
| Preoperative<br>radiotherapy               |                                |                    |         |
| No                                         | 50 of 459 (10.9)               | 0.88 (0.58, 1.31)  | 0.517   |
| Yes                                        | 57 of 465 (12.3)               | 1.00               |         |
| Intraoperative bleeding                    |                                |                    |         |
| No                                         | 97 of 833 (11.6)               | 1.00               |         |
| Yes                                        | 10 of 91 (11)                  | 0.93 (0.47, 1.87)  | 0.853   |
| Preoperative organ<br>injury               |                                |                    |         |
| No                                         | 100 of 850 (11.8)              | 1.00               |         |
| Yes                                        | 7 of 74 (9)                    | 0.78 (0.35, 1.75)  | 0.553   |
| Closure of<br>anastomosis‡                 |                                |                    |         |
| Double stapled                             | 92 of 808 (11.4)               | 1.00               |         |
| Single stapled                             | 9 of 69 (13)                   | 1.17 (0.56, 2.43)  | 0.679   |
| Handsewn                                   | 5 of 46 (11)                   | 0.95 (0.37, 2.46)  | 0.914   |
| Type of<br>reconstruction§                 |                                |                    |         |
| Pouch                                      | 22 of 261 (8.4)                | 1.00               |         |
| End-to-end<br>anastomosis                  | 17 of 107 (15.9)               | 2.05 (1.04, 4.04)  | 0.038   |
| Side-to-end<br>anastomosis                 | 68 of 550 (12.4)               | 1.53 (0.93, 2.54)  | 0.098   |
| Diverting stoma                            |                                |                    |         |
| Yes                                        | 43 of 523 (8.2)                | 1.00               |         |
| No                                         | 64 of 401 (16.0)               | 2.12 (1.41, 3.20)  | < 0.001 |
| Omentoplasty                               |                                |                    |         |
| Yes                                        | 26 of 197 (13.2)               | 1.00               |         |
| No                                         | 81 of 725 (11.2)               | 0.83 (0.52, 1.33)  | 0.431   |
| Pelvic drainage                            |                                |                    |         |
| Yes                                        | 76 of 792 (9.6)                | 1.00               |         |
| No                                         | 31 of 132 (23.5)               | 2.89 (1.81, 4.61)  | < 0.001 |
| Operating time¶                            |                                | 1.00 (0.99, 1.00)  | 0.942   |
| TNM stage                                  |                                |                    |         |
| 0                                          | 1 of 20 (5)                    | 1.00               |         |
| I                                          | 31 of 285 (10.9)               | 2.32 (0.30, 17.93) | 0.420   |
| II                                         | 29 of 230 (12.6)               | 2.74 (0.35, 21.26) | 0.335   |
| III                                        | 38 of 345 (11.0)               | 2.35 (0.31, 18.07) | 0.411   |
| IV                                         | 8 of 44 (18)                   | 4.22 (0.49, 36.32) | 0.190   |

Values in parentheses are \*percentages and †95 per cent confidence intervals. ‡One, §six and ¶seven patients missing. TNM, tumour node metastasis. \*\*Chi-square test for comparison of proportions, and Student's *t*-test for continuous variables.

although this difference was not statistically significant ( $P = 0.057$ ). A colonic pouch was constructed in 261 patients. Patients with a pouch had a leakage rate of

8.4 per cent, compared with 12.4 per cent in patients with an side-to-end anastomosis and 15.9 per cent in those with an end-to-end anastomosis ( $P = 0.092$ ).

The correlation between tumour location and leakage rate was not significant: leakage rates for tumours 5.0 cm or less from the anal verge, between 5.1 and 10.0 cm, and more than 10.1 cm were 13, 11.3 and 11.6 per cent respectively ( $P = 0.872$ ). However, when the tumour was located more proximally, a protective stoma was constructed less often; faecal diversion was performed in 73, 62.3 and 47.1 per cent respectively ( $P < 0.001$ ).

The single-variable regression analysis included a number of other continuous and dichotomous parameters that may be associated with clinical anastomotic leakage. The absence of a diverting stoma, non-placement of pelvic drains, and the formation of an end-to-end or end-to-side anastomosis showed a significant association with anastomotic failure (*Table 1*).

Multiple regression analysis was performed to exclude confounding due to interaction between the covariates. Absence of a defunctioning stoma and lack of pelvic drainage remained the only two significant risk factors. Male sex was not significant ( $P = 0.055$ ) (*Table 2*). The absence of a protective stoma was significantly associated with increased anastomotic dehiscence rates in both men and women (*Table 3*). Moreover, this association was also observed in patients with low or high rectal tumours (*Table 3*).

### Management of symptomatic anastomotic leakage

Fifteen (14.0 per cent) of 107 patients with anastomotic leakage died within 30 days of surgery. The mortality rate related to anastomotic leakage did not differ significantly

**Table 2** Multiple regression analysis of symptomatic anastomotic leakage

|                         | Relative risk     | P       |
|-------------------------|-------------------|---------|
| Diverting stoma         |                   |         |
| Yes                     | 1.00              |         |
| No                      | 1.89 (1.24, 2.90) | 0.003   |
| Sex                     |                   |         |
| F                       | 1.00              |         |
| M                       | 1.55 (0.99, 2.42) | 0.055   |
| Type of reconstruction  |                   |         |
| Pouch                   | 1.00              |         |
| End-to-end anastomosis  | 1.70 (0.85, 3.41) | 0.135   |
| Side-to-end anastomosis | 1.43 (0.85, 2.39) | 0.176   |
| Pelvic drainage         |                   |         |
| Yes                     | 1.00              |         |
| No                      | 2.53 (1.57, 4.09) | < 0.001 |

Values in parentheses are 95 per cent confidence intervals.

**Table 3** Symptomatic anastomotic leakage in patients with and without a protective stoma according to sex and tumour location

|                                            | Anastomotic leakage |                       | P*    |
|--------------------------------------------|---------------------|-----------------------|-------|
|                                            | Stoma<br>(n = 523)  | No stoma<br>(n = 401) |       |
| Sex                                        |                     |                       |       |
| M                                          | 34 of 336 (10.1)    | 41 of 234 (17.5)      | 0.011 |
| F                                          | 9 of 187 (4.8)      | 23 of 167 (13.8)      | 0.003 |
| Distance of tumour<br>from anal verge (cm) |                     |                       |       |
| ≤ 5.0                                      | 4 of 49 (8)         | 5 of 18 (28)          | 0.040 |
| 5.1–10.0                                   | 27 of 288 (9.4)     | 25 of 174 (14.4)      | 0.100 |
| ≥ 10.1                                     | 12 of 186 (6.5)     | 34 of 209 (16.3)      | 0.002 |

Values in parentheses are percentages. \*Chi-square test.

between patients with and without diversion (six of 43 versus nine of 64;  $P = 0.987$ ), nor between patients with or without pelvic drainage (nine of 76 versus six of 31;  $P = 0.310$ ). Seventy-nine patients had surgical reintervention for a suspected anastomotic failure: in 44 patients a defunctioning stoma was constructed, in eight an end-colostomy was fashioned and in 13 patients a Hartmann procedure was performed. In 21 patients the reintervention consisted of abscess drainage only. Fifteen of the 86 patients who had a surgical reintervention died, compared with none of the other patients with leakage.

The need for surgical reintervention after detection of anastomotic failure was significantly lower for patients with pre-existing pelvic drainage than for those without a drain (56 of 76 versus 30 of 31 respectively;  $P = 0.006$ ). A diverting stoma was also associated with a lower rate of surgical reintervention, as only 26 of 43 patients with a stoma underwent reoperation compared with 60 of 64 patients without a stoma ( $P < 0.001$ ).

## Discussion

In this large study population, symptomatic anastomotic leakage was detected in 11.6 per cent of patients, which is comparable with previous reports<sup>1,12,13,18</sup>. Before the start of the randomized trial, some surgeons expected increased surgical morbidity as a result of irradiation. In an earlier report it was shown that preoperative hypofractionated radiotherapy is a safe treatment with no increase in the surgical complication rate<sup>19</sup>. There was no significant association between leakage and short-term preoperative radiotherapy, which has become part of the standard regimen for rectal cancer treatment in many European countries.

Data in the present analysis were derived from a prospective randomized trial that investigated the efficacy

of short-term preoperative radiotherapy in patients with rectal cancer treated by TME. The trial was not set up to answer any question regarding anastomotic leakage. Therefore, any statement based on data from the trial must be made carefully. However, the present analysis is informative and has identified risk factors for anastomotic leakage.

In the multiple regression analysis, the absence of pelvic drainage after TME and absence of a defunctioning stoma were the only two factors significantly associated with anastomotic dehiscence. After TME surgery, there is a large presacral space in which a haematoma or seroma may develop that constitutes an excellent medium for bacteria<sup>20</sup>. Any infection may extend to, involve and drain into the anastomosis and cause dehiscence. Pelvic drainage may prevent this process. Nevertheless, several trials have failed to show benefit of pelvic drainage<sup>21–25</sup>. However, these trials included heterogeneous populations of patients having either colonic<sup>23,24</sup> or colorectal<sup>22,25</sup> resections, many of whom did not undergo TME<sup>21,25</sup>. Thus the results cannot automatically be applied to patients after TME. Furthermore, the trials were often underpowered to detect small differences that may be clinically relevant to surgeons and their patients<sup>22</sup>. It is the present authors' view that there are few drawbacks to pelvic drainage and, although not investigated prospectively, the present findings suggest that it is wise to establish drainage of the presacral space after TME.

The creation of a stoma should effectively divert the faecal stream from a healing anastomosis, thereby mitigating the consequences of anastomotic failure. It is generally accepted that low rectal anastomoses after TME are particularly vulnerable to anastomotic failure<sup>1,26</sup>. In the present series, however, patients with both low and high rectal tumours were found to be at substantial risk of anastomotic leakage, and both patient categories may benefit from faecal diversion. In the present study, the decision to construct a defunctioning stoma was left to the discretion of the surgeon. Clearly, this decision is not made solely in an attempt to prevent leakage; other factors, such as the possible reduced quality of life after stoma formation<sup>27</sup> and the subsequent need to close a temporary stoma<sup>28</sup>, play an important role in the decision. Indeed, temporary protective stomas tend to be left *in situ* for longer than is initially anticipated. After a median follow-up of 5 years, 19.2 per cent of the present patients with a 'temporary diversion' still had a stoma (data not shown).

One possible important risk factor for anastomotic leakage is the performance of the individual surgeon<sup>29–32</sup>, a confounding factor that is hard to measure but may be crucial. In the present study surgeons had varying strategies



with regard to pelvic drainage or stoma construction, and it could be argued that patients with drains and a protective stoma might have had a higher *a priori* risk of anastomotic dehiscence. However, this was found not to be the case, so strengthening the relationship between drainage, faecal diversion and lower rates of anastomotic failure.

Construction of a temporary stoma and the placement of one or more drains in the presacral space were significantly associated with decreased clinical anastomotic leakage in patients with rectal cancer treated with TME. Moreover, these two measures were associated with a reduction in the proportion of leaks requiring surgical reintervention, and thus with a less severe clinical course in patients with anastomotic leakage. In an attempt to minimize the risk of clinical leakage, the construction of a defunctioning stoma seems advisable for patients with both proximal and distal rectal tumours, regardless of sex. Placement of at least one drain after TME for rectal cancer is recommended.

### Acknowledgements

The authors are indebted to Mr R. J. Heald, instructing surgeon in the Dutch TME trial. They are grateful to all participating clinical investigators of the Dutch TME trial, who have been acknowledged previously<sup>15</sup>, and to the Data Centre of the Department of Surgery, Leiden University Medical Centre, for its contribution to the trial and the present analysis.

The Dutch TME Trial was supported by grants from the Dutch Cancer Society (CKVO 95-04), the Dutch National Health Council (OWG 97/026) and the Swedish Cancer Society. K.C.M.J.P. is a Medical Research Fellow of the European Organisation for Research and Treatment of Cancer.

### References

- Rullier E, Laurent C, Garrelon JL, Michel P, Saric J, Parneix M. Risk factors for anastomotic leakage after resection of rectal cancer. *Br J Surg* 1998; **85**: 355–358.
- Averbach AM, Chang D, Koslowe P, Sugarbaker PH. Anastomotic leak after double-stapled low colorectal resection. *Dis Colon Rectum* 1996; **39**: 780–787.
- Antonsen HK, Kronborg O. Early complications after low anterior resection for rectal cancer using the EEA stapling device. A prospective trial. *Dis Colon Rectum* 1987; **30**: 579–583.
- Pakkastie TE, Luukkonen PE, Jarvinen HJ. Anastomotic leakage after anterior resection of the rectum. *Eur J Surg* 1994; **160**: 293–297.
- Graf W, Glimelius B, Bergstrom R, Pahlman L. Complications after double and single stapling in rectal surgery. *Eur J Surg* 1991; **157**: 543–547.
- Bell SW, Walker KG, Rickard MJ, Sinclair G, Dent OF, Chapuis PH *et al*. Anastomotic leakage after curative anterior resection results in a higher prevalence of local recurrence. *Br J Surg* 2003; **90**: 1261–1266.
- Fujita S, Teramoto T, Watanabe M, Kodaira S, Kitajima M. Anastomotic leakage after colorectal cancer surgery: a risk factor for recurrence and poor prognosis. *Jpn J Clin Oncol* 1993; **23**: 299–302.
- Petersen S, Freitag M, Hellmich G, Ludwig K. Anastomotic leakage: impact on local recurrence and survival in surgery of colorectal cancer. *Int J Colorectal Dis* 1998; **13**: 160–163.
- Heald RJ. A new approach to rectal cancer. *Br J Hosp Med* 1979; **22**: 277–281.
- Heald RJ, Ryall RD. Recurrence and survival after total mesorectal excision for rectal cancer. *Lancet* 1986; **i**: 1479–1482.
- Enker WE, Thaler HT, Cranor ML, Polyak T. Total mesorectal excision in the operative treatment of carcinoma of the rectum. *J Am Coll Surg* 1995; **181**: 335–346.
- Aitken RJ. Mesorectal excision for rectal cancer. *Br J Surg* 1996; **83**: 214–216.
- Carlsen E, Schlichting E, Guldvog I, Johnson E, Heald RJ. Effect of the introduction of total mesorectal excision for the treatment of rectal cancer. *Br J Surg* 1998; **85**: 526–529.
- Poon RT, Chu KW, Ho JW, Chan CW, Law WL, Wong J. Prospective evaluation of selective defunctioning stoma for low anterior resection with total mesorectal excision. *World J Surg* 1999; **23**: 463–467.
- Kapiteijn E, Marijnen CAM, Nagtegaal ID, Putter H, Steup WH, Wiggers T *et al*. Preoperative radiotherapy combined with total mesorectal excision for resectable rectal cancer. *N Engl J Med* 2001; **345**: 638–646.
- Klein Kranenburg E, van de Velde CJ. Surgical trials in oncology. The importance of quality control in the TME trial. *Eur J Cancer* 2002; **38**: 937–942.
- Kapiteijn E, Klein Kranenburg E, Steup WH, Taat CW, Rutten HJ, Wiggers T *et al*. Total mesorectal excision (TME) with or without preoperative radiotherapy in the treatment of primary rectal cancer. Prospective randomised trial with standard operative and histopathological techniques. Dutch ColoRectal Cancer Group. *Eur J Surg* 1999; **165**: 410–420.
- Dehni N, Schlegel RD, Cunningham C, Guiguet M, Tiret E, Parc R. Influence of a defunctioning stoma on leakage rates after low colorectal anastomosis and colonic J pouch–anal anastomosis. *Br J Surg* 1998; **85**: 1114–1117.
- Marijnen CA, Kapiteijn E, van de Velde CJ, Martijn H, Steup WH, Wiggers T *et al*. Acute side effects and complications after short-term preoperative radiotherapy combined with total mesorectal excision in primary rectal cancer: report of a multicenter randomized trial. *J Clin Oncol* 2002; **20**: 817–825.
- Hilsabeck JR. The presacral space as a collector of fluid accumulations following rectal anastomosis: tolerance of rectal anastomosis to closed suction pelvic drainage. *Dis Colon Rectum* 1982; **25**: 680–684.

- 21 Merad F, Hay JM, Fingerhut A, Yahchouchi E, Laborde Y, Pelissier E *et al.* Is prophylactic pelvic drainage useful after elective rectal or anal anastomosis? A multicenter controlled randomized trial. French Association for Surgical Research. *Surgery* 1999; **125**: 529–535.
- 22 Fingerhut A, Msika S, Yahchouchi E, Merad F, Hay JM, Millat B. Neither pelvic nor abdominal drainage is needed after anastomosis in elective, uncomplicated, colorectal surgery. *Ann Surg* 2000; **231**: 613–614.
- 23 Hoffmann J, Shokouh-Amiri MH, Damm P, Jensen R. A prospective, controlled study of prophylactic drainage after colonic anastomoses. *Dis Colon Rectum* 1987; **30**: 449–452.
- 24 Johnson CD, Lamont PM, Orr N, Lennox M. Is a drain necessary after colonic anastomosis? *J R Soc Med* 1989; **82**: 661–664.
- 25 Sagar PM, Couse N, Kerin M, May J, MacFie J. Randomized trial of drainage of colorectal anastomosis. *Br J Surg* 1993; **80**: 769–771.
- 26 Karanjia ND, Corder AP, Bearn P, Heald RJ. Leakage from stapled low anastomosis after total mesorectal excision for carcinoma of the rectum. *Br J Surg* 1994; **81**: 1224–1226.
- 27 O'Leary DP, Fide CJ, Foy C, Lucarotti ME. Quality of life after low anterior resection with total mesorectal excision and temporary loop ileostomy for rectal carcinoma. *Br J Surg* 2001; **88**: 1216–1220.
- 28 Bailey CM, Wheeler JM, Birks M, Farouk R. The incidence and causes of permanent stoma after anterior resection. *Colorectal Dis* 2003; **5**: 331–334.
- 29 McArdle CS, Hole D. Impact of variability among surgeons on postoperative morbidity and mortality and ultimate survival. *BMJ* 1991; **302**: 1501–1505.
- 30 Kessler H, Hermanek P Jr, Wiebelt H. Operative mortality in carcinoma of the rectum. Results of the German Multicentre Study. *Int J Colorectal Dis* 1993; **8**: 158–166.
- 31 Fielding LP, Stewart-Brown S, Blesovsky L, Kearney G. Anastomotic integrity after operations for large-bowel cancer: a multicentre study. *BMJ* 1980; **281**: 411–414.
- 32 Hannan EL, O'Donnell JF, Kilburn H Jr, Bernard HR, Yazici A. Investigation of the relationship between volume and mortality for surgical procedures performed in New York State hospitals. *JAMA* 1989; **262**: 503–510.
